# Supplementary material for: Ab initio quantum chemical computations of substituent effects on triaziridine strain energy and heat of formation
Source: Royal Society of Chemistry journal article supplement (doi:10.1039/b816782f), 2009-01-01

Supplementary Information for the Manuscript

*Ab initio* quantum chemical computations of substituent effects on triaziridine strain energy and heat of formation.

Roberto Peverati, Jay S. Siegel and Kim K Baldrige\*

Coordinates of Primary Computed Structures

**Optimized M06/DZV(2d,p) structures**

**Trans-triaziridine cs**

|   |     |               |               |               |
|---|-----|---------------|---------------|---------------|
| N | 7.0 | 0.7884282119  | -0.3063933409 | 0.0000000000  |
| N | 7.0 | -0.3249179371 | 0.2704044047  | 0.7257613666  |
| N | 7.0 | -0.3249179371 | 0.2704044047  | -0.7257613666 |
| H | 1.0 | 1.4876410290  | 0.4429404635  | 0.0000000000  |
| H | 1.0 | -0.8505766834 | -0.5517929660 | 1.0439121616  |
| H | 1.0 | -0.8505766834 | -0.5517929660 | -1.0439121616 |

TOTAL ENERGY = -165.8650763984  
ZPE: 0.047845

**cis-triaziridine c3v**

|   |     |               |               |               |
|---|-----|---------------|---------------|---------------|
| N | 7.0 | -0.4196681997 | 0.7268866442  | -0.2314781129 |
| N | 7.0 | -0.4196681997 | -0.7268866442 | -0.2314781129 |
| N | 7.0 | 0.8393363994  | 0.0000000000  | -0.2314781129 |
| H | 1.0 | -0.5997294195 | 1.0387618254  | 0.7314781129  |
| H | 1.0 | -0.5997294195 | -1.0387618254 | 0.7314781129  |
| H | 1.0 | 1.1994588391  | 0.0000000000  | 0.7314781129  |

TOTAL ENERGY = -165.8494756160  
ZPE: 0.046381

**flat-triaziridine d3h**

|   |     |               |               |              |
|---|-----|---------------|---------------|--------------|
| N | 7.0 | -0.4011038603 | 0.6947322651  | 0.0000000000 |
| N | 7.0 | -0.4011038603 | -0.6947322651 | 0.0000000000 |
| N | 7.0 | 0.8022077206  | 0.0000000000  | 0.0000000000 |
| H | 1.0 | -0.8986167877 | 1.5564499328  | 0.0000000000 |
| H | 1.0 | -0.8986167877 | -1.5564499328 | 0.0000000000 |
| H | 1.0 | 1.7972335754  | 0.0000000000  | 0.0000000000 |

TOTAL ENERGY = -165.6583979862  
ZPE: 0.041419

**CH3-cis-triaziridine - absolute minimum**

|   |     |               |               |               |
|---|-----|---------------|---------------|---------------|
| N | 7.0 | -0.6970497457 | 0.0808635184  | 0.6988786861  |
| N | 7.0 | -1.6195278928 | -0.7558748896 | -0.0272397042 |
| N | 7.0 | -1.7189096344 | 0.6961981329  | -0.1090262800 |
| C | 6.0 | 0.6031047529  | 0.0397091486  | 0.0375366521  |
| H | 1.0 | -2.3301569057 | -1.0044816131 | 0.6685011261  |
| H | 1.0 | -1.2977273023 | 0.8961688037  | -1.0286112480 |
| H | 1.0 | 0.5096558880  | -0.1660723038 | -1.0401288788 |
| H | 1.0 | 1.1027377616  | 0.9994851995  | 0.1980093814  |
| H | 1.0 | 1.2012692706  | -0.7491767284 | 0.5007405458  |

TOTAL ENERGY = -205.1509325722  
ZPE: 0.074900

**CH3-trans-triaziridine - 2nd minimum**

|   |     |               |               |               |
|---|-----|---------------|---------------|---------------|
| N | 7.0 | 0.1898008847  | 0.0000493795  | -0.5584896083 |
| N | 7.0 | -0.8031361771 | 0.7291675935  | 0.1948911321  |
| N | 7.0 | -0.8031020577 | -0.7292567130 | 0.1947585947  |
| C | 6.0 | 1.4425832487  | 0.0000016652  | 0.1958240510  |
| H | 1.0 | -1.4700309322 | 1.0424375688  | -0.5200138821 |
| H | 1.0 | -1.4699965125 | -1.0424050282 | -0.5202017054 |
| H | 1.0 | 2.0092636290  | 0.8905154819  | -0.0889108945 |
| H | 1.0 | 2.0092093682  | -0.8905289257 | -0.0889734179 |
| H | 1.0 | 1.2612876748  | -0.0000326478 | 1.2764181765  |

TOTAL ENERGY = -205.1492781917  
ZPE: 0.074598

**all-cis-CH3-triaziridine - 3rd minimum**

|   |     |               |               |               |
|---|-----|---------------|---------------|---------------|
| N | 7.0 | 0.8631714737  | -0.7347943725 | 0.1548455103  |
| N | 7.0 | -0.1341679418 | -0.0000020574 | -0.5737674047 |
| N | 7.0 | 0.8632637139  | 0.7347451672  | 0.1548830996  |
| C | 6.0 | -1.4389383915 | -0.0000423063 | 0.0663336930  |
| H | 1.0 | 0.4271442542  | -1.0216340181 | 1.0475084439  |
| H | 1.0 | 0.4270285446  | 1.0217639817  | 1.0473868855  |
| H | 1.0 | -1.9908205986 | 0.8883078252  | -0.2539178003 |
| H | 1.0 | -1.3598926173 | -0.0000986946 | 1.1723417982  |
| H | 1.0 | -1.9909791201 | -0.8882382802 | -0.2540336891 |

TOTAL ENERGY = -205.1378503552  
ZPE: 0.073981

**CF3-cis-triaziridine - absolute minimum**

|   |     |               |               |               |
|---|-----|---------------|---------------|---------------|
| N | 7.0 | -0.7301655298 | 0.1412058017  | 0.6825984281  |
| N | 7.0 | -1.6308755613 | -0.7613875412 | 0.0177627402  |
| N | 7.0 | -1.7691768328 | 0.6748712853  | -0.1567756894 |
| C | 6.0 | 0.5734360161  | 0.0520534486  | 0.0571743233  |
| H | 1.0 | -2.3147005330 | -0.9930678094 | 0.7450084382  |
| H | 1.0 | -1.3683782421 | 0.8279359058  | -1.0918037897 |
| F | 9.0 | 0.5522240883  | -0.0531500345 | -1.2681536376 |
| F | 9.0 | 1.2452348387  | 1.1459374440  | 0.3639634053  |
| F | 9.0 | 1.1957979482  | -0.9975792321 | 0.5488860620  |

TOTAL ENERGY = -502.8893117796  
ZPE: 0.053213

**CF3-trans-triaziridine - 2nd minimum**

|   |     |               |               |               |
|---|-----|---------------|---------------|---------------|
| N | 7.0 | 0.7195602552  | -0.0001491014 | 0.7091507016  |
| N | 7.0 | 1.6916543791  | 0.7279826655  | -0.0594869115 |
| N | 7.0 | 1.6917512292  | -0.7277387757 | -0.0598768132 |
| C | 6.0 | -0.5554901699 | -0.0000397675 | 0.0096701180  |
| H | 1.0 | 2.3546081072  | 1.0559333546  | 0.6521866600  |
| H | 1.0 | 2.3547514547  | -1.0559908984 | 0.6516160208  |
| F | 9.0 | -0.4782105495 | 0.0002332663  | -1.3021013304 |
| F | 9.0 | -1.2155807806 | -1.0772206000 | 0.3952549065  |
| F | 9.0 | -1.2156486164 | 1.0769366387  | 0.3957048262  |

TOTAL ENERGY = -502.8867008923  
ZPE: 0.052703

**all-cis-CF3-triaziridine - 3rd minimum**

|   |     |               |               |               |
|---|-----|---------------|---------------|---------------|
| N | 7.0 | 1.7315515600  | -0.7313044639 | 0.1132379752  |
| N | 7.0 | 0.7606157186  | -0.0003193498 | -0.6577926236 |
| N | 7.0 | 1.7314650176  | 0.7312452655  | 0.1128867817  |
| C | 6.0 | -0.5663475332 | -0.0001386635 | -0.0947228892 |
| H | 1.0 | 1.2715901828  | -1.0280059270 | 0.9869286461  |
| H | 1.0 | 1.2712579388  | 1.0286047348  | 0.9862103737  |
| F | 9.0 | -1.1987953884 | 1.0770102735  | -0.5063093011 |
| F | 9.0 | -0.6012255278 | -0.0005612133 | 1.2499892350  |
| F | 9.0 | -1.1994613277 | -1.0765340224 | -0.5071682598 |

TOTAL ENERGY = -502.8760399979  
ZPE: 0.052210

**O<sup>-</sup>-cis-triaziridine - absolute minimum**

|   |     |               |               |               |
|---|-----|---------------|---------------|---------------|
| N | 7.0 | 0.2254198190  | -0.1615257107 | 0.5978718332  |
| N | 7.0 | -0.8949521843 | 0.7891759576  | 0.1553234069  |
| N | 7.0 | -0.9668857450 | -0.5788646242 | -0.3717405221 |
| O | 8.0 | 1.3071261748  | 0.0350374868  | -0.0487208489 |
| H | 1.0 | -0.3876012171 | 1.2580369224  | -0.6114455716 |
| H | 1.0 | -1.6222980435 | -1.0137923823 | 0.2926472942  |

TOTAL ENERGY = -240.4466363351  
ZPE: 0.036467

**O<sup>-</sup>-trans-triaziridine - 2nd minimum**

|   |     |               |               |               |
|---|-----|---------------|---------------|---------------|
| N | 7.0 | -0.3227907673 | 0.0000333332  | -0.5123129130 |
| N | 7.0 | 0.9694826955  | 0.7297157357  | 0.1222663440  |
| N | 7.0 | 0.9693969659  | -0.7298020964 | 0.1222943277  |
| O | 8.0 | -1.3088697833 | 0.0001125406  | 0.2534146257  |
| H | 1.0 | 1.4567137524  | 1.0240721973  | -0.7365102409 |
| H | 1.0 | 1.4566175091  | -1.0242029377 | -0.7364785488 |

TOTAL ENERGY = -240.4354045283  
ZPE: 0.034951

**all-cis-O<sup>-</sup>-triaziridine - 3rd minimum**

|   |     |               |               |               |
|---|-----|---------------|---------------|---------------|
| N | 7.0 | 0.9619890247  | -0.7393163847 | 0.1488014686  |
| N | 7.0 | -0.1556658462 | -0.0000523267 | -0.5721881700 |
| N | 7.0 | 0.9620666821  | 0.7393058834  | 0.1489255701  |
| O | 8.0 | -1.2475663232 | 0.0000111993  | 0.1405734948  |
| H | 1.0 | 0.4251486500  | -0.9906593025 | 0.9957835538  |
| H | 1.0 | 0.4250843348  | 0.9907163485  | 0.9957629211  |

TOTAL ENERGY = -240.4470762758  
ZPE: 0.036709

**BH2-cis-triaziridine - absolute minimum**

|   |     |               |               |               |
|---|-----|---------------|---------------|---------------|
| N | 7.0 | 0.2152547516  | -0.0017885248 | -0.1174947521 |
| N | 7.0 | -1.0333333321 | -0.5966633470 | -0.3218132893 |
| N | 7.0 | -0.8923998473 | 0.8311096955  | 0.0672768278  |
| B | 5.0 | 1.5852767997  | -0.1390118265 | -0.1042038587 |
| H | 1.0 | -1.2834118282 | -1.0519274461 | 0.5652977815  |
| H | 1.0 | -1.0319463918 | 1.3249100141  | -0.8234464615 |
| H | 1.0 | 2.2309109920  | 0.8381615309  | 0.0973330816  |

H 1.0 2.0297246391 -1.2246844041 -0.2937964305

TOTAL ENERGY = -191.3167146983  
ZPE: 0.058843

**BH2-trans and all-cis-BH2 same structure - 2nd minimum**

N 7.0 -0.2973422267 -0.0403851758 0.0390412346  
N 7.0 0.8712824236 -0.7820685699 -0.1662013882  
N 7.0 0.8848544510 0.7047159853 -0.0348811144  
B 5.0 -1.6755299826 -0.0248937553 0.0131104048  
H 1.0 1.1243221878 -1.1678545392 0.7548003719  
H 1.0 1.1439171547 0.9174390266 0.9390856977  
H 1.0 -2.2110282121 1.0305854481 0.1174810160  
H 1.0 -2.2322027715 -1.0712561760 -0.0699801075

TOTAL ENERGY = -191.3090894148  
ZPE: 0.058418

**OH-cis-triaziridine - absolute minimum**

N 7.0 -0.1702631091 -0.1724959204 -0.5435668969  
N 7.0 0.8627168356 -0.6798395715 0.3032519065  
N 7.0 0.8393718648 0.7373116052 -0.0483150939  
O 8.0 -1.3109515890 -0.0887820749 0.2799876867  
H 1.0 1.5394612189 -1.0918237854 -0.3472225779  
H 1.0 0.4083237487 1.1607527846 0.7842409545  
H 1.0 -2.0215880614 0.0111777982 -0.3664830682

TOTAL ENERGY = -241.0383893477  
ZPE: 0.051095

**OH-trans-triaziridine - 2nd minimum**

N 7.0 0.1756915763 -0.0068054950 0.5418010989  
N 7.0 -0.8286813662 -0.7278832135 -0.1931037397  
N 7.0 -0.8202059771 0.7309163588 -0.1876282487  
O 8.0 1.3364482077 -0.0102668844 -0.2339502977  
H 1.0 -1.4661612592 -1.0624556522 0.5391974291  
H 1.0 -1.4539758430 1.0672904071 0.5470597305  
H 1.0 2.0272737943 -0.0187417054 0.4400702498

TOTAL ENERGY = -241.0314587704  
ZPE: 0.050583

**all-cis-OH-triaziridine - 3rd minimum**

|   |     |               |               |               |
|---|-----|---------------|---------------|---------------|
| N | 7.0 | -0.8684178902 | 0.7345307200  | 0.1002408052  |
| N | 7.0 | 0.1606467487  | 0.0019071580  | -0.5891372151 |
| N | 7.0 | -0.8661325521 | -0.7352263725 | 0.0989334184  |
| O | 8.0 | 1.3135586032  | 0.0029046947  | 0.2438590696  |
| H | 1.0 | -0.4131755189 | 1.0409566879  | 0.9711949069  |
| H | 1.0 | -0.4099852904 | -1.0420031043 | 0.9692553383  |
| H | 1.0 | 2.0373023349  | 0.0037984322  | -0.3958934384 |

TOTAL ENERGY = -241.0295320965  
ZPE: 0.050224

#### **F-cis-triaziridine - absolute minimum**

|   |     |               |               |               |
|---|-----|---------------|---------------|---------------|
| N | 7.0 | 0.0982202591  | -0.1498862770 | 0.6368174286  |
| N | 7.0 | -0.8592452508 | 0.8025082982  | 0.1517163335  |
| N | 7.0 | -0.8785860454 | -0.5800661321 | -0.3105980084 |
| F | 9.0 | 1.2724387668  | 0.0037898026  | -0.1140375314 |
| H | 1.0 | -0.3792825696 | 1.2928019647  | -0.6135403632 |
| H | 1.0 | -1.5927363561 | -1.0410800068 | 0.2635777325  |

TOTAL ENERGY = -265.0500355786  
ZPE: 0.038337

#### **F-trans-triaziridine - 2nd minimum**

|   |     |               |               |               |
|---|-----|---------------|---------------|---------------|
| N | 7.0 | -0.1714156440 | 0.0000881577  | -0.5630710809 |
| N | 7.0 | 0.8782815236  | 0.7274850416  | 0.0834121401  |
| N | 7.0 | 0.8781434653  | -0.7275091106 | 0.0834359928  |
| O | 9.0 | -1.2393946848 | 0.0000041197  | 0.3148383797  |
| H | 1.0 | 1.4375650780  | 1.0798336464  | -0.7029883293 |
| H | 1.0 | 1.4373706342  | -1.0799730821 | -0.7029535077 |

TOTAL ENERGY = -265.0445030899  
ZPE: 0.038301

#### **all-cis-F-triaziridine - 3rd minimum**

|   |     |               |               |               |
|---|-----|---------------|---------------|---------------|
| N | 7.0 | 0.9232869627  | -0.7312654692 | 0.1492380139  |
| N | 7.0 | -0.0579965356 | -0.0000294195 | -0.5996051023 |
| N | 7.0 | 0.9233257260  | 0.7312901820  | 0.1492593998  |
| F | 9.0 | -1.2431783842 | 0.0000152636  | 0.2002156782  |
| H | 1.0 | 0.4128249308  | -1.0598193978 | 0.9792788873  |
| H | 1.0 | 0.4127938222  | 1.0598142583  | 0.9792719614  |

TOTAL ENERGY = -265.0402648148

ZPE: 0.037500

**F-triaziridine c2-TransitionState M06/DZV(2d,p)**

|   |     |               |               |               |
|---|-----|---------------|---------------|---------------|
| N | 7.0 | 0.0000000000  | 0.0000000000  | 0.0903050520  |
| N | 7.0 | -0.7033603569 | -0.3654554756 | -1.0260386624 |
| N | 7.0 | 0.7033603569  | 0.3654554756  | -1.0260386624 |
| F | 9.0 | 0.0000000000  | 0.0000000000  | 1.4258153708  |
| H | 1.0 | -1.3147245001 | 0.4355646212  | -1.2785665490 |
| H | 1.0 | 1.3147245001  | -0.4355646212 | -1.2785665490 |

TOTAL ENERGY = -264.9238561804

ZPE: 0.036888

**F-triaziridine cs-TransitionState M06/DZV(2d,p)**

|   |     |               |               |               |
|---|-----|---------------|---------------|---------------|
| N | 7.0 | -0.0680872649 | -0.9114953801 | -0.7974323949 |
| N | 7.0 | -0.0680872649 | -0.9114953801 | 0.7974323949  |
| N | 7.0 | -0.0488358314 | 0.1945307395  | 0.0000000000  |
| H | 1.0 | 0.9280793002  | -1.1498088076 | -1.0230636283 |
| H | 1.0 | 0.9280793002  | -1.1498088076 | 1.0230636283  |
| F | 9.0 | -0.0700502393 | 1.5289556360  | 0.0000000000  |

TOTAL ENERGY = -264.9184195337

ZPE: 0.036075

**CN-cis-triaziridine - absolute minimum**

|   |     |               |               |               |
|---|-----|---------------|---------------|---------------|
| N | 7.0 | -0.2778651976 | -0.1277899787 | 0.5929457909  |
| N | 7.0 | -1.1519915545 | -0.6479031914 | -0.4451613464 |
| N | 7.0 | -1.2165116740 | 0.7535547063  | -0.0857202781 |
| C | 6.0 | 1.0102637791  | -0.0377127414 | 0.1384018707  |
| H | 1.0 | -1.9120717546 | -1.0747585264 | 0.0967495032  |
| H | 1.0 | -0.7018141551 | 1.2181775334  | -0.8469326181 |
| N | 7.0 | 2.1395442629  | 0.0531133912  | -0.1298960373 |

TOTAL ENERGY = -258.0391304584

ZPE: 0.045466

**CN-trans-triaziridine - 2nd minimum**

|   |     |               |               |               |
|---|-----|---------------|---------------|---------------|
| N | 7.0 | -0.2912151261 | -0.0002115912 | -0.5989728123 |
| N | 7.0 | -1.2020237240 | 0.7252023855  | 0.2707537364  |

|   |     |               |               |               |
|---|-----|---------------|---------------|---------------|
| N | 7.0 | -1.2022084208 | -0.7251885563 | 0.2708673409  |
| C | 6.0 | 0.9842128230  | 0.0000019700  | -0.0924289796 |
| N | 7.0 | 2.1095548087  | 0.0001608328  | 0.1995021416  |
| H | 1.0 | -1.9247101554 | 1.0520202516  | -0.3831877469 |
| H | 1.0 | -1.9248831259 | -1.0519826630 | -0.3831312162 |

TOTAL ENERGY = -258.0354801835  
ZPE: 0.045440

**all-cis-CN-triaziridine - 3rd minimum**

|   |     |               |               |               |
|---|-----|---------------|---------------|---------------|
| N | 7.0 | -1.2089165478 | -0.7945946332 | -0.1874056328 |
| N | 7.0 | -0.2985026722 | -0.0091832423 | 0.6376689951  |
| N | 7.0 | -1.3326671670 | 0.6516191172  | -0.1482898609 |
| C | 6.0 | 0.9503773782  | 0.1088421553  | 0.0973969324  |
| H | 1.0 | -0.6933786996 | -1.0431708225 | -1.0451268877 |
| H | 1.0 | -0.8758076389 | 1.0323528477  | -0.9908783466 |
| N | 7.0 | 2.0474795514  | 0.2112329620  | -0.2849253806 |

TOTAL ENERGY = -258.0274351962  
ZPE: 0.045048

**CN-triaziridine c2-TransitionState M06/DZV(2d,p)**

|   |               |               |               |
|---|---------------|---------------|---------------|
| N | 0.0000000000  | 0.0000000000  | 0.0341272252  |
| N | -0.6659965197 | -0.3469987583 | -1.1424380072 |
| N | 0.6659965197  | 0.3469987583  | -1.1424380072 |
| C | 0.0000000000  | 0.0000000000  | 1.3294008275  |
| N | 0.0000000000  | 0.0000000000  | 2.5017362495  |
| H | -1.3149630940 | 0.4301779593  | -1.3367391439 |
| H | 1.3149630940  | -0.4301779593 | -1.3367391439 |

TOTAL ENERGY = -258.0089207717  
ZPE: 0.044947

**CN-triaziridine cs-TransitionState M06/DZV(2d,p)**

|   |     |               |               |               |
|---|-----|---------------|---------------|---------------|
| N | 7.0 | -0.0822253185 | -1.3381816257 | -0.7548458166 |
| N | 7.0 | -0.0822253185 | -1.3381816257 | 0.7548458166  |
| N | 7.0 | -0.0789279769 | -0.1647798007 | 0.0000000000  |
| H | 1.0 | 0.8996316593  | -1.4987050378 | -1.0364766474 |
| H | 1.0 | 0.8996316593  | -1.4987050378 | 1.0364766474  |
| C | 6.0 | -0.0357300758 | 1.1304442077  | 0.0000000000  |
| N | 7.0 | 0.0118533710  | 2.3017069201  | 0.0000000000  |



TOTAL ENERGY = -258.0012542438  
ZPE: 0.044527

**O<sup>-</sup>triaziridine c2-TransitionState M06/DZV(2d,p)**

|   |     |               |               |               |
|---|-----|---------------|---------------|---------------|
| N | 7.0 | 0.0000000000  | 0.0000000000  | 0.1189590997  |
| N | 7.0 | -0.6916161417 | -0.3483986617 | -1.0311460150 |
| N | 7.0 | 0.6916161417  | 0.3483986617  | -1.0311460150 |
| O | 8.0 | 0.0000000000  | 0.0000000000  | 1.3475438297  |
| H | 1.0 | -1.3346113755 | 0.4295218168  | -1.2486504497 |
| H | 1.0 | 1.3346113755  | -0.4295218168 | -1.2486504497 |

TOTAL ENERGY = -240.3643451145  
ZPE: 0.037454

**O<sup>-</sup>triaziridine cs-TransitionState M06/DZV(2d,p)**

|   |     |               |               |               |
|---|-----|---------------|---------------|---------------|
| N | 7.0 | -0.0860804716 | -0.8560913849 | -0.7731619651 |
| N | 7.0 | -0.0860804716 | -0.8560913849 | 0.7731619651  |
| N | 7.0 | 0.0057190445  | 0.2724471845  | 0.0000000000  |
| H | 1.0 | 0.9307836948  | -1.2119942216 | -0.9729546300 |
| H | 1.0 | 0.9307836948  | -1.2119942216 | 0.9729546300  |
| O | 8.0 | -0.1053334908 | 1.5956430284  | 0.0000000000  |

TOTAL ENERGY = -240.3367738467

ZERO POINT ENERGY: 0.031920

**Cl, cs\_min**

|    |               |               |               |
|----|---------------|---------------|---------------|
| N  | 1.3228374847  | -0.1559205759 | -0.7289862069 |
| N  | 1.3228374847  | -0.1559205759 | 0.7289862069  |
| N  | 0.3935278247  | 0.6683370226  | 0.0000000000  |
| H  | 0.7890977048  | -0.9701878235 | -1.0609520976 |
| H  | 0.7890977048  | -0.9701878235 | 1.0609520976  |
| CL | -1.2458282038 | -0.0986002238 | 0.0000000000  |

TOTAL ENERGY = -625.3911612111  
ZPE 0.036406

**Cl, cs\_ts**

Supplementary Material (ESI) for *PCCP*  
This journal is © the Owner Societies 2009

|    |      |               |               |               |
|----|------|---------------|---------------|---------------|
| N  | 7.0  | 1.4373842380  | 0.0663257925  | -0.7737280132 |
| N  | 7.0  | 1.4373842380  | 0.0663257925  | 0.7737280132  |
| N  | 7.0  | 0.2911553632  | 0.0247320484  | 0.0000000000  |
| H  | 1.0  | 1.6699141252  | -0.9184559354 | -1.0196880903 |
| H  | 1.0  | 1.6699141252  | -0.9184559354 | 1.0196880903  |
| CL | 17.0 | -1.3498920894 | -0.0042317627 | 0.0000000000  |

TOTAL ENERGY = -625.3092096390  
ZPE: 0.035869

**Cl, tr\_c1min**

|    |               |               |               |
|----|---------------|---------------|---------------|
| N  | 0.9079418595  | -0.1455917785 | 0.0269697670  |
| N  | -0.3706003929 | -0.8118754594 | -0.1510940882 |
| N  | -0.3108231668 | 0.6177553554  | -0.0026855012 |
| H  | 1.2802493749  | -0.0398568847 | -0.9242224029 |
| H  | -0.5686690399 | -1.2020824030 | 0.7789716451  |
| CL | -0.6700986349 | 1.1174615536  | 1.6720605801  |

TOTAL ENERGY = -625.4005848228  
ZPE: 0.036996

**Cl, tr\_c2ts**

|    |      |               |               |               |
|----|------|---------------|---------------|---------------|
| N  | 7.0  | 0.7626215077  | 0.0918849785  | 1.4450390456  |
| N  | 7.0  | -0.7626215077 | -0.0918849785 | 1.4450390456  |
| N  | 7.0  | 0.0000000000  | 0.0000000000  | 0.2898488690  |
| H  | 1.0  | 1.0736580037  | -0.8686601813 | 1.6716126297  |
| H  | 1.0  | -1.0736580037 | 0.8686601813  | 1.6716126297  |
| CL | 17.0 | 0.0000000000  | 0.0000000000  | -1.3507722196 |

TOTAL ENERGY = -625.3155960319  
ZPE: 0.036235

**CCH, cs\_c1min**

|   |     |               |               |               |
|---|-----|---------------|---------------|---------------|
| N | 7.0 | 1.2459995812  | -0.1922254254 | -0.7286993147 |
| N | 7.0 | 1.2459995812  | -0.1922254254 | 0.7286993147  |
| N | 7.0 | 0.2966159536  | 0.6394360820  | 0.0000000000  |
| H | 1.0 | 0.7185589319  | -1.0249878211 | -1.0320703009 |
| H | 1.0 | 0.7185589319  | -1.0249878211 | 1.0320703009  |
| C | 6.0 | -0.9757051204 | 0.1414062130  | 0.0000000000  |
| C | 6.0 | -2.1309436051 | -0.2203844621 | 0.0000000000  |
| H | 1.0 | -3.1492442545 | -0.5362113400 | 0.0000000000  |

TOTAL ENERGY = -241.9327964817  
ZPE: 0.055410

**CCH, cs\_ts**

Supplementary Material (ESI) for *PCCP*  
This journal is © the Owner Societies 2009

|   |     |               |               |               |
|---|-----|---------------|---------------|---------------|
| N | 7.0 | 1.3713047140  | 0.0552249637  | -0.7567436964 |
| N | 7.0 | 1.3713047140  | 0.0552249637  | 0.7567436964  |
| N | 7.0 | 0.1995393292  | 0.0494668749  | 0.0000000000  |
| H | 1.0 | 1.5384256516  | -0.9280536560 | -1.0324729716 |
| H | 1.0 | 1.5384256516  | -0.9280536560 | 1.0324729716  |
| C | 6.0 | -1.0960246377 | 0.0170550017  | 0.0000000000  |
| C | 6.0 | -2.3105827960 | -0.0565803720 | 0.0000000000  |
| H | 1.0 | -3.3724526267 | -0.0003741200 | 0.0000000000  |

TOTAL ENERGY = -241.9052673578  
ZPE: 0.054396

**CCH, tr\_c1min**

|   |     |               |               |               |
|---|-----|---------------|---------------|---------------|
| N | 7.0 | 0.7575424877  | -0.1783994105 | -0.8412258487 |
| N | 7.0 | -0.6622086336 | -0.4730394549 | -0.7716942093 |
| N | 7.0 | -0.0762997735 | 0.5080884760  | 0.1317337285  |
| H | 1.0 | 0.8232959834  | 0.5052013188  | -1.6039772829 |
| H | 1.0 | -0.6843168512 | -1.3630709258 | -0.2541812088 |
| C | 6.0 | 0.1504896385  | 0.0441125132  | 1.3992727328  |
| C | 6.0 | 0.2860913298  | -0.2622425381 | 2.5606722957  |
| H | 1.0 | 0.4234058191  | -0.5438777008 | 3.5793997927  |

TOTAL ENERGY = -241.9433530712  
ZPE: 0.055900

**CCH, tr\_c2ts**

|   |     |               |               |               |
|---|-----|---------------|---------------|---------------|
| N | 7.0 | 0.7467361875  | 0.0934591477  | 1.3736681197  |
| N | 7.0 | -0.7467361875 | -0.0934591477 | 1.3736681197  |
| N | 7.0 | 0.0000000000  | 0.0000000000  | 0.1978483711  |
| H | 1.0 | 1.0811838599  | -0.8614321084 | 1.5730384888  |
| H | 1.0 | -1.0811838599 | 0.8614321084  | 1.5730384888  |
| C | 6.0 | 0.0000000000  | 0.0000000000  | -1.0978320015 |
| C | 6.0 | 0.0000000000  | 0.0000000000  | -2.3141523904 |
| H | 1.0 | 0.0000000000  | 0.0000000000  | -3.3771471962 |

TOTAL ENERGY = -241.9125497254  
ZPE: 0.054599

**NO2, cis\_csmin**

|   |     |               |               |               |
|---|-----|---------------|---------------|---------------|
| N | 7.0 | 0.8379403213  | -0.2800573638 | 0.1795127109  |
| N | 7.0 | -0.5065684394 | -0.6274125448 | -0.2383955512 |
| N | 7.0 | -0.1943495739 | 0.7263893596  | 0.0366956112  |
| H | 1.0 | 1.3746666659  | -0.2010921351 | -0.6910353004 |
| H | 1.0 | -0.9344745778 | -1.0057495840 | 0.6224311235  |
| N | 7.0 | -0.5142579017 | 1.0667867102  | 1.5141190512  |
| O | 8.0 | -0.2015616222 | 2.1812545177  | 1.8028345166  |

O 8.0 -1.0630101144 0.2211396910 2.1738378380

TOTAL ENERGY = -370.3081075980  
ZPE: 0.049538

**NO2, cis\_csts**

N 7.0 1.6294600405 0.0577091505 -0.7727899928  
N 7.0 1.6294600405 0.0577091505 0.7727899928  
N 7.0 0.4880314139 0.0449726640 0.0000000000  
H 1.0 1.8008208429 -0.9225954052 -1.0566085228  
H 1.0 1.8008208429 -0.9225954052 1.0566085228  
N 7.0 -0.8634681526 0.0063798475 0.0000000000  
O 8.0 -1.3800175139 -0.0120800011 -1.0990722473  
O 8.0 -1.3800175139 -0.0120800011 1.0990722473

TOTAL ENERGY = -370.2437461919  
ZPE: 0.048384

**NO2, tr\_c1min**

N 7.0 0.8379403213 -0.2800573638 0.1795127109  
N 7.0 -0.5065684394 -0.6274125448 -0.2383955512  
N 7.0 -0.1943495739 0.7263893596 0.0366956112  
H 1.0 1.3746666659 -0.2010921350 -0.6910353004  
H 1.0 -0.9344745778 -1.0057495840 0.6224311235  
N 7.0 -0.5142579017 1.0667867102 1.5141190512  
O 8.0 -0.2015616221 2.1812545176 1.8028345167  
O 8.0 -1.0630101145 0.2211396910 2.1738378380

TOTAL ENERGY = -370.3081075980  
ZPE: 0.049538

**NO2, tr\_c2ts**

N 7.0 0.7618748514 0.0948017261 1.6309875323  
N 7.0 -0.7618748514 -0.0948017261 1.6309875323  
N 7.0 0.0000000000 0.0000000000 0.4862648374  
H 1.0 1.1016788540 -0.8571231618 1.8376103847  
H 1.0 -1.1016788540 0.8571231618 1.8376103847  
N 7.0 0.0000000000 0.0000000000 -0.8640537874  
O 8.0 1.0991978320 -0.0027328337 -1.3817684420  
O 8.0 -1.0991978320 0.0027328337 -1.3817684420

TOTAL ENERGY = -370.2516317732  
ZPE: 0.048834

**NH2\_cis\_csmin**

N 7.0 0.8264723235 0.0259659862 0.0101868061

Supplementary Material (ESI) for *PCCP*  
This journal is © the Owner Societies 2009

|   |     |               |               |               |
|---|-----|---------------|---------------|---------------|
| N | 7.0 | -0.4383010802 | -0.6998222190 | 0.0104283582  |
| N | 7.0 | -0.4225619249 | 0.7366790408  | -0.1544474053 |
| H | 1.0 | 1.1976632862  | -0.0535109944 | -0.9502423321 |
| H | 1.0 | -0.5558909657 | -1.0625487006 | -0.9491953848 |
| N | 7.0 | -0.5832314387 | 1.0160025007  | -1.5714243292 |
| H | 1.0 | -1.5906192017 | 1.1417586304  | -1.6909997592 |
| H | 1.0 | -0.2009665894 | 1.9567639986  | -1.6881804184 |

TOTAL ENERGY = -221.1671813312  
ZPE: 0.063926

**NH2\_cis\_csts**

|   |     |               |               |               |
|---|-----|---------------|---------------|---------------|
| N | 7.0 | 0.8796201807  | -0.0953214732 | -0.7307634156 |
| N | 7.0 | 0.8796201807  | -0.0953214732 | 0.7307634156  |
| N | 7.0 | -0.1805182358 | 0.5822446454  | 0.0000000000  |
| H | 1.0 | 0.4902013021  | -1.0074158130 | -1.0175578825 |
| H | 1.0 | 0.4902013021  | -1.0074158130 | 1.0175578825  |
| N | 7.0 | -1.4249892120 | -0.1377206508 | 0.0000000000  |
| H | 1.0 | -1.4996777589 | -0.7179747111 | -0.8328144698 |
| H | 1.0 | -1.4996777589 | -0.7179747111 | 0.8328144698  |

TOTAL ENERGY = -221.1482114704  
ZPE: 0.062176

**NH2\_cis\_csts new**

|   |     |               |               |               |
|---|-----|---------------|---------------|---------------|
| N | 7.0 | 1.6395245898  | -0.2215126358 | -0.8403600503 |
| N | 7.0 | 1.6707915522  | 0.2369623827  | 0.6413243680  |
| N | 7.0 | 0.5011779405  | 0.0307842080  | -0.0741450605 |
| H | 1.0 | 1.8243150850  | -1.2435674337 | -0.7799859397 |
| H | 1.0 | 1.8678916522  | -0.6407845548 | 1.1638564932  |
| N | 7.0 | -0.8158590645 | 0.0784463368  | -0.0049544285 |
| H | 1.0 | -1.2534269382 | 0.8072700968  | -0.5646578981 |
| H | 1.0 | -1.3002048170 | -0.8164284001 | -0.0628274839 |

TOTAL ENERGY = -221.1003752065  
ZPE: 0.062264

**NH2\_tr\_c1min**

|   |     |               |               |               |
|---|-----|---------------|---------------|---------------|
| N | 7.0 | 0.8306795458  | 0.0853357588  | 0.0315117471  |
| N | 7.0 | -0.2249459221 | -0.9225441653 | -0.0072624698 |
| N | 7.0 | -0.5500216475 | 0.4765459296  | 0.1545229066  |
| H | 1.0 | 1.0654328201  | 0.2413321136  | -0.9539766547 |
| H | 1.0 | -0.2168094014 | -1.3045696687 | 0.9485628696  |
| N | 7.0 | -0.8069827044 | 0.7724100038  | 1.5253461013  |
| H | 1.0 | 0.0959053262  | 0.9262923588  | 1.9777510532  |

H 1.0 -1.3082707187 1.6564563201 1.5235444466

TOTAL ENERGY = -221.1773462357  
ZPE: 0.063852

**NH2\_tr\_c2ts**

N 7.0 0.7652541939 0.0944743652 0.9402402561  
N 7.0 -0.7652541939 -0.0944743652 0.9402402561  
N 7.0 0.0000000000 0.0000000000 -0.2248587079  
H 1.0 1.0771887867 -0.8628178389 1.1731012838  
H 1.0 -1.0771887867 0.8628178389 1.1731012838  
N 7.0 0.0000000000 0.0000000000 -1.5247493022  
H 1.0 -0.0475806742 0.8712167520 -2.0412025348  
H 1.0 0.0475806742 -0.8712167520 -2.0412025348

TOTAL ENERGY = -221.1055688851  
ZPE: 0.061854

**Trans-triaziridine at B3LYP/dzv(2d,p):**

N 7.0 0.0000203471 0.8391698400 -0.0956998934  
N 7.0 0.7348734129 -0.4196356819 0.0802569556  
N 7.0 -0.7348925387 -0.4196008290 0.0802575279  
H 1.0 0.0000309150 1.2488387313 0.8443905342  
H 1.0 1.0540046916 -0.6414065894 -0.8706055596  
H 1.0 -1.0540377305 -0.6413552972 -0.8706054319

TOTAL ENERGY = -165.8762720938

**Cis-triaziridine at B3LYP/dzv(2d,p)**

N 7.0 0.8462449711 0.0772309406 0.0808061320  
N 7.0 -0.3562388005 -0.7714798939 0.0808048748  
N 7.0 -0.4900097421 0.6942464271 0.0808044672  
H 1.0 1.2090510901 0.1103477430 -0.8815768515  
H 1.0 -0.5089443999 -1.1022273724 -0.8816376290  
H 1.0 -0.7000634844 0.9918932095 -0.8816269657

TOTAL ENERGY = -165.8613367694

**Flat-triaziridine at B3LYP/dzv(2d,p)**

N 7.0 0.7297001698 0.3521558553 0.0000000000  
N 7.0 -0.6698100984 0.4557820878 0.0000000000  
N 7.0 -0.0598383454 -0.8079381157 0.0000000000  
H 1.0 1.6273646723 0.7849086597 0.0000000000  
H 1.0 -1.4940275193 1.0159986384 0.0000000000

H 1.0 -0.1335429768 -1.8017447226 0.0000000000

TOTAL ENERGY = -165.6660080512

**MONO-SUBSTITUTED TRIAZIRIDINES:**

**CH3-cis-triaziridine with B3LYP/dzv(2d,p) – absolute minimum of the PES**

N 7.0 -0.5761496400 1.2068056336 0.1086466053  
N 7.0 0.0202653206 0.0015974352 -0.3789683165  
N 7.0 -0.5820856362 -1.2031093550 0.1029631675  
C 6.0 1.4290182367 -0.0023722985 0.0058536507  
H 1.0 -1.4881859657 1.2946132176 -0.3364589751  
H 1.0 -0.7419502114 1.1306907720 1.1225587460  
H 1.0 -1.4910326219 -1.2882648687 -0.3488840877  
H 1.0 -0.7549338711 -1.1283892000 1.1157439793  
H 1.0 1.5636195215 -0.0061620041 1.1049671523  
H 1.0 1.9008130499 -0.8974299475 -0.4050520686  
H 1.0 1.9042324321 0.8935102654 -0.3993581274

TOTAL ENERGY = -206.4278486941

**CH3-trans-triaziridine with B3LYP/dzv(2d,p) – 2<sup>nd</sup> minimum of the PES**

N 7.0 0.1932310925 -0.0000064107 -0.5531319263  
N 7.0 -0.8211364233 0.7386878268 0.1957649786  
N 7.0 -0.8211645118 -0.7386852989 0.1957507538  
C 6.0 1.4525885678 -0.0000342992 0.2011985807  
H 1.0 -1.4781284849 1.0551392027 -0.5277189037  
H 1.0 -1.4781606628 -1.0551069827 -0.5277207247  
H 1.0 2.0170427693 0.8916845963 -0.0910217503  
H 1.0 2.0171570062 -0.8915645634 -0.0912433775  
H 1.0 1.2844497728 -0.0001656967 1.2834248154

TOTAL ENERGY = -205.1665784367

**All-cis-CH3-triaziridine with B3LYP/dzv(2d,p) – 3<sup>rd</sup> minimum of the PES**

N 7.0 0.8743304908 -0.7453823585 0.1548891899  
N 7.0 -0.1396944996 0.0000023161 -0.5720884253  
N 7.0 0.8743389632 0.7453790477 0.1548654833  
C 6.0 -1.4538227424 -0.0000007461 0.0679812117  
H 1.0 0.4518022918 -1.0343230276 1.0524347256  
H 1.0 0.4517932427 1.0343298795 1.0524516478  
H 1.0 -2.0019237415 0.8895833005 -0.2609532876  
H 1.0 -1.3890831620 -0.0000066454 1.1729644328

Supplementary Material (ESI) for *PCCP*  
This journal is © the Owner Societies 2009

H 1.0 -2.0019315259 -0.8895745212 -0.2609644417

TOTAL ENERGY = -205.1549312558

**CF3-cis-triaziridine with B3LYP/dzv(2d,p) – absolute minimum of the PES**

N 7.0 -0.7270363442 0.1330318198 0.6842436864  
N 7.0 -1.6517355694 -0.7692140635 0.0138934286  
N 7.0 -1.7794491304 0.6881877607 -0.1556243170  
C 6.0 0.5817709086 0.0489818302 0.0601370778  
H 1.0 -2.3322393559 -0.9986838663 0.7460330318  
H 1.0 -1.3850017122 0.8401777391 -1.0935117694  
F 9.0 0.5659847984 -0.0636221851 -1.2812925485  
F 9.0 1.2560570766 1.1610124876 0.3638969070  
F 9.0 1.2250455208 -1.0030522543 0.5608847838

TOTAL ENERGY = -502.8947726183

**CF3-trans-triaziridine with B3LYP/dzv(2d,p) – 2<sup>nd</sup> minimum of the PES**

N 7.0 0.7180557706 0.0000083820 0.7055870448  
N 7.0 1.7122945556 0.7363587756 -0.0615900633  
N 7.0 1.7122575669 -0.7363077924 -0.0616688530  
C 6.0 -0.5626276325 0.0000022898 0.0093970201  
H 1.0 2.3653820756 1.0674975701 0.6588220602  
H 1.0 2.3653104908 -1.0675677171 0.6587072117  
F 9.0 -0.4956892427 0.0005109110 -1.3188202347  
F 9.0 -1.2335709966 -1.0877402206 0.4004422546  
F 9.0 -1.2340172787 1.0871845836 0.4012417378

TOTAL ENERGY = -502.8921571220

**All-cis-CF3-triaziridine with B3LYP/dzv(2d,p) – 3<sup>rd</sup> minimum of the PES**

N 7.0 1.7448497538 -0.7404061198 0.1162889097  
N 7.0 0.7585091382 -0.0000015625 -0.6598696528  
N 7.0 1.7448442644 0.7404062226 0.1163021699  
C 6.0 -0.5741220636 0.0000112064 -0.1000857386  
H 1.0 1.2899503851 -1.0384650956 0.9918092349  
H 1.0 1.2899560222 1.0384606749 0.9918065475  
F 9.0 -1.2190415178 1.0867239096 -0.5174172608  
F 9.0 -0.6152406868 -0.0000161926 1.2618717323  
F 9.0 -1.2190546548 -1.0867164091 -0.5174460042

TOTAL ENERGY = -502.8822273664



**O<sup>-</sup>-cis-triaziridine with B3LYP/dzv(2d,p) – absolute minimum of the PES**

|   |     |               |               |               |
|---|-----|---------------|---------------|---------------|
| N | 7.0 | 0.8252603381  | -0.5748597403 | -0.2455590341 |
| N | 7.0 | -0.4737655392 | -0.2526905174 | 0.4778629626  |
| N | 7.0 | 1.1024573370  | 0.8266255261  | 0.0511414752  |
| H | 1.0 | 1.3464428207  | -1.0616381058 | 0.4946966432  |
| O | 8.0 | -1.4256706022 | -0.1471945061 | -0.3224015628 |
| H | 1.0 | 0.6280449801  | 1.2750702812  | -0.7445689473 |

TOTAL ENERGY = -240.4652572702

**O<sup>-</sup>-trans-triaziridine with B3LYP/dzv(2d,p) – 2<sup>nd</sup> minimum of the PES**

|   |     |               |               |               |
|---|-----|---------------|---------------|---------------|
| N | 7.0 | -0.4753466398 | 0.0001536978  | 0.5012955254  |
| N | 7.0 | 0.9539972115  | -0.7269487185 | -0.1308536767 |
| N | 7.0 | 0.9522403261  | 0.7265308439  | -0.1301502783 |
| O | 8.0 | -1.4312374831 | 0.0002480354  | -0.2832475523 |
| H | 1.0 | 1.3863950722  | -1.0373658876 | 0.7524086558  |
| H | 1.0 | 1.3855293639  | 1.0374507952  | 0.7524937681  |

TOTAL ENERGY = -240.4550184232

**All-cis-O<sup>-</sup>-triaziridine with B3LYP/dzv(2d,p) – 3<sup>rd</sup> minimum of the PES**

|   |     |               |               |               |
|---|-----|---------------|---------------|---------------|
| N | 7.0 | 0.9120126906  | -0.7459649451 | 0.1528989973  |
| N | 7.0 | -0.2665355152 | 0.0000234577  | -0.5783608762 |
| N | 7.0 | 0.9118988971  | 0.7459380977  | 0.1528940426  |
| O | 8.0 | -1.3485368873 | 0.0000161193  | 0.1436878119  |
| H | 1.0 | 0.3932514850  | -1.0096219281 | 1.0044284047  |
| H | 1.0 | 0.3932727336  | 1.0096146144  | 1.0043982217  |

TOTAL ENERGY = -240.4620080484

**BH2-cis-triaziridine with B3LYP/dzv(2d,p) – absolute minimum of the PES**

|   |     |               |               |               |
|---|-----|---------------|---------------|---------------|
| N | 7.0 | 0.2184884117  | -0.0014485558 | -0.1168031974 |
| N | 7.0 | -1.0342392953 | -0.6121368235 | -0.3235503240 |
| N | 7.0 | -0.8915977035 | 0.8461115381  | 0.0683931015  |
| B | 5.0 | 1.5888232434  | -0.1390362696 | -0.1034353690 |
| H | 1.0 | -1.2894677906 | -1.0611784341 | 0.5661540658  |
| H | 1.0 | -1.0371333709 | 1.3348730840  | -0.8251771718 |
| H | 1.0 | 2.2344071502  | 0.8407837045  | 0.0952797672  |
| H | 1.0 | 2.0307951379  | -1.2278625516 | -0.2917079734 |

TOTAL ENERGY = -191.3283260302

**BH2-trans-triaziridine with B3LYP/dzv(2d,p) – 2<sup>nd</sup> minimum of the PES**

Same structure of all-cis-BH2 – see the article draft

**All-cis-BH2-triaziridine with B3LYP/dzv(2d,p) – 2<sup>nd</sup> minimum of the PES**

|   |     |               |               |               |
|---|-----|---------------|---------------|---------------|
| N | 7.0 | -0.3017228872 | -0.0411111229 | 0.0499502293  |
| N | 7.0 | 0.8687521037  | -0.7972134734 | -0.1667916044 |
| N | 7.0 | 0.8830549004  | 0.7191650830  | -0.0327144245 |
| B | 5.0 | -1.6800211449 | -0.0244488988 | 0.0121145574  |
| H | 1.0 | 1.1354971850  | -1.1803496096 | 0.7526235033  |
| H | 1.0 | 1.1548593482  | 0.9299128019  | 0.9392822094  |
| H | 1.0 | -2.2161628549 | 1.0331922619  | 0.1125963922  |
| H | 1.0 | -2.2359836262 | -1.0728647983 | -0.0746047478 |

TOTAL ENERGY = -191.3210192534

**OH-cis-triaziridine with B3LYP/dzv(2d,p) – absolute minimum of the PES**

|   |     |               |               |               |
|---|-----|---------------|---------------|---------------|
| N | 7.0 | -0.1715681683 | -0.1747963599 | -0.5451407941 |
| N | 7.0 | 0.8722812526  | -0.6886204684 | 0.3054861131  |
| N | 7.0 | 0.8437997464  | 0.7512112397  | -0.0496575069 |
| O | 8.0 | -1.3327360497 | -0.1008834775 | 0.2834271545  |
| H | 1.0 | 1.5487533403  | -1.0983291882 | -0.3480442597 |
| H | 1.0 | 0.4221838297  | 1.1714995744  | 0.7887882229  |
| H | 1.0 | -2.0356430426 | 0.0162195157  | -0.3729660191 |

TOTAL ENERGY = -241.0518753522

**OH-trans-triaziridine with B3LYP/dzv(2d,p) – 2<sup>nd</sup> minimum of the PES**

|   |     |               |               |               |
|---|-----|---------------|---------------|---------------|
| N | 7.0 | 0.1769849959  | -0.0013299321 | 0.5434658580  |
| N | 7.0 | -0.8359417833 | -0.7389653917 | -0.1927935392 |
| N | 7.0 | -0.8314036941 | 0.7407049565  | -0.1895301774 |
| O | 8.0 | 1.3546916033  | 0.0018922410  | -0.2388717301 |
| H | 1.0 | -1.4703499994 | -1.0761846824 | 0.5425769365  |
| H | 1.0 | -1.4646745242 | 1.0797702378  | 0.5456405721  |
| H | 1.0 | 2.0410825347  | -0.0338336137 | 0.4429583023  |

TOTAL ENERGY = -241.0453101296

**All-cis-OH-triaziridine with B3LYP/dzv(2d,p) – 3<sup>rd</sup> minimum of the PES**

|   |     |               |               |               |
|---|-----|---------------|---------------|---------------|
| N | 7.0 | -0.8739854418 | 0.7463325156  | 0.1014701730  |
| N | 7.0 | 0.1604263886  | 0.0004615657  | -0.5917947231 |
| N | 7.0 | -0.8730180900 | -0.7466322518 | 0.1006220026  |

Supplementary Material (ESI) for *PCCP*  
This journal is © the Owner Societies 2009

|   |     |               |               |               |
|---|-----|---------------|---------------|---------------|
| O | 8.0 | 1.3366691836  | -0.0001728206 | 0.2454078529  |
| H | 1.0 | -0.4249604263 | 1.0533688024  | 0.9752919541  |
| H | 1.0 | -0.4241486161 | -1.0543570150 | 0.9742763834  |
| H | 1.0 | 2.0528134371  | 0.0078674196  | -0.4068207580 |

TOTAL ENERGY = -241.0434316034

**F-cis-triaziridine with B3LYP/dzv(2d,p) – absolute minimum of the PES**

|   |     |               |               |               |
|---|-----|---------------|---------------|---------------|
| N | 7.0 | 0.0975374035  | -0.1492642572 | 0.6430644207  |
| N | 7.0 | -0.8616664240 | 0.8151426324  | 0.1535811310  |
| N | 7.0 | -0.8842195330 | -0.5910934237 | -0.3121151617 |
| F | 9.0 | 1.2984128672  | -0.0007702517 | -0.1162473049 |
| H | 1.0 | -0.3871003354 | 1.3025226104  | -0.6168920678 |
| H | 1.0 | -1.6021551744 | -1.0484696607 | 0.2625445743  |

TOTAL ENERGY = -265.0628992461

**F-trans-triaziridine with B3LYP/dzv(2d,p) – 2<sup>nd</sup> minimum of the PES**

|   |     |               |               |               |
|---|-----|---------------|---------------|---------------|
| N | 7.0 | -0.1723787693 | 0.0001195302  | -0.5675087127 |
| N | 7.0 | 0.8838554239  | 0.7383422326  | 0.0822478063  |
| N | 7.0 | 0.8837029206  | -0.7384184845 | 0.0821795484  |
| O | 9.0 | -1.2624737893 | 0.0000834185  | 0.3235024715  |
| H | 1.0 | 1.4439097718  | 1.0939123228  | -0.7039027382 |
| H | 1.0 | 1.4439348146  | -1.0941102469 | -0.7038447806 |

TOTAL ENERGY = -265.0573310686

**All-cis-F-triaziridine with B3LYP/dzv(2d,p) – 3<sup>rd</sup> minimum of the PES**

|   |     |               |               |               |
|---|-----|---------------|---------------|---------------|
| N | 7.0 | 0.9280614029  | -0.7428688150 | 0.1505790465  |
| N | 7.0 | -0.0536945917 | -0.0000030800 | -0.6060131893 |
| N | 7.0 | 0.9280477920  | 0.7428760794  | 0.1505976535  |
| F | 9.0 | -1.2697042759 | -0.0000015417 | 0.1991511907  |
| H | 1.0 | 0.4191673383  | -1.0723370658 | 0.9816813268  |
| H | 1.0 | 0.4191788564  | 1.0723398405  | 0.9816628102  |

TOTAL ENERGY = -265.0539803872

**CN-cis-triaziridine with B3LYP/dzv(2d,p) – minimum of the PES**

|   |     |               |               |               |
|---|-----|---------------|---------------|---------------|
| N | 7.0 | -0.2648538231 | -0.1300788786 | 0.5889374395  |
| N | 7.0 | -1.1670883719 | -0.6543698453 | -0.4518491967 |
| N | 7.0 | -1.2250980029 | 0.7647567957  | -0.0857760815 |

|   |     |               |               |               |
|---|-----|---------------|---------------|---------------|
| C | 6.0 | 1.0251600978  | -0.0410013812 | 0.1365450015  |
| H | 1.0 | -1.9192519298 | -1.0809051310 | 0.1025049186  |
| H | 1.0 | -0.7194333858 | 1.2284047786  | -0.8533550936 |
| N | 7.0 | 2.1601191220  | 0.0498748548  | -0.1166201028 |

TOTAL ENERGY = -258.0606734452

**CN-trans-triaziridine with B3LYP/dzv(2d,p) – 2<sup>nd</sup> minimum of the PES**

|   |     |               |               |               |
|---|-----|---------------|---------------|---------------|
| N | 7.0 | -0.2801567919 | -0.0000015829 | -0.5913149673 |
| N | 7.0 | -1.2187169155 | 0.7336761768  | 0.2772895253  |
| N | 7.0 | -1.2186969951 | -0.7336622165 | 0.2773141111  |
| C | 6.0 | 0.9961548260  | -0.0000013918 | -0.0872844156 |
| N | 7.0 | 2.1280764070  | -0.0000030484 | 0.1878886636  |
| H | 1.0 | -1.9289589983 | 1.0621829391  | -0.3902433442 |
| H | 1.0 | -1.9289744527 | -1.0621882469 | -0.3902471089 |

TOTAL ENERGY = -258.0571986019

**All-cis-CN-triaziridine with B3LYP/dzv(2d,p) – 3rd minimum of the PES**

|   |     |               |               |               |
|---|-----|---------------|---------------|---------------|
| N | 7.0 | -1.2178477240 | -0.8040040220 | -0.1878571852 |
| N | 7.0 | -0.2818976098 | -0.0088980907 | 0.6331901295  |
| N | 7.0 | -1.3419895735 | 0.6602513200  | -0.1482100716 |
| C | 6.0 | 0.9699219022  | 0.1117366887  | 0.0969507941  |
| H | 1.0 | -0.7188876467 | -1.0578919803 | -1.0539711044 |
| H | 1.0 | -0.8968763066 | 1.0406817900  | -0.9971625593 |
| N | 7.0 | 2.0761611625  | 0.2152226786  | -0.2645001842 |

TOTAL ENERGY = -258.0492733710

**CN-triaziridine c2-TransitionState B3LYP/DZV(2d,p)**

-----

|   |     |              |               |               |
|---|-----|--------------|---------------|---------------|
| N | 7.0 | 0.0000000000 | 0.0000000000  | 0.0370179340  |
| N | 7.0 | 0.6824058042 | 0.3498154588  | -1.1441244482 |
| C | 6.0 | 0.0000000000 | 0.0000000000  | 1.3339229340  |
| N | 7.0 | 0.0000000000 | 0.0000000000  | 2.5086581341  |
| H | 1.0 | 1.3238667945 | -0.4338696102 | -1.3422200529 |

COORDINATES OF ALL ATOMS ARE (ANGS)

| ATOM | CHARGE | X             | Y             | Z             |
|------|--------|---------------|---------------|---------------|
| N    | 7.0    | 0.0000000000  | 0.0000000000  | 0.0370179340  |
| N    | 7.0    | -0.6824058042 | -0.3498154588 | -1.1441244482 |
| N    | 7.0    | 0.6824058042  | 0.3498154588  | -1.1441244482 |
| C    | 6.0    | 0.0000000000  | 0.0000000000  | 1.3339229340  |

-----

```
N      7.0  0.0000000000  0.0000000000  2.5086581341
H      1.0 -1.3238667945  0.4338696102 -1.3422200529
H      1.0  1.3238667945 -0.4338696102 -1.3422200529
```

TOTAL ENERGY = -258.0289375294  
ZPE: 0.044176

### F-triaziridine c2-TransitionState B3LYP/DZV(2d,p)

```
-----
N      7.0  0.0000000000  0.0000000000  0.0829053804
N      7.0  0.7309039856  0.3739352445 -1.0243284489
F      9.0  0.0000000000  0.0000000000  1.4435900038
H      1.0  1.3255777921 -0.4380433930 -1.2854642432
```

COORDINATES OF ALL ATOMS ARE (ANGS)

```
ATOM CHARGE   X       Y       Z
```

```
-----
N      7.0  0.0000000000  0.0000000000  0.0829053804
N      7.0 -0.7309039856 -0.3739352445 -1.0243284489
N      7.0  0.7309039856  0.3739352445 -1.0243284489
F      9.0  0.0000000000  0.0000000000  1.4435900038
H      1.0 -1.3255777921  0.4380433930 -1.2854642432
H      1.0  1.3255777921 -0.4380433930 -1.2854642432
```

TOTAL ENERGY = -264.9389051354  
ZPE: 0.035863

### O<sup>-</sup>-triaziridine c2-TransitionState B3LYP/DZV(2d,p)

```
-----
N      7.0  0.0000000000  0.0000000000  0.1184040198
N      7.0  0.7098394360  0.3539296882 -1.0336206257
O      8.0  0.0000000000  0.0000000000  1.3596828330
H      1.0  1.3452728272 -0.4312012812 -1.2519678007
```

COORDINATES OF ALL ATOMS ARE (ANGS)

```
ATOM CHARGE   X       Y       Z
```

```
-----
N      7.0  0.0000000000  0.0000000000  0.1184040198
N      7.0 -0.7098394360 -0.3539296882 -1.0336206257
N      7.0  0.7098394360  0.3539296882 -1.0336206257
O      8.0  0.0000000000  0.0000000000  1.3596828330
H      1.0 -1.3452728272  0.4312012812 -1.2519678007
H      1.0  1.3452728272 -0.4312012812 -1.2519678007
```

TOTAL ENERGY = -240.3842915891  
ZPE: 0.036691

**CN-triaziridine cs-TransitionState B3LYP/DZV(2d,p)**

```
-----  
N      7.0  0.6671025528 -0.7688441758  0.0000000000  
N      7.0 -0.3922276449 -0.0477787112  0.7350939583  
C      6.0  1.8789733582 -0.1360562953  0.0000000000  
N      7.0  2.9584168067  0.3110766091  0.0000000000  
H      1.0  0.0149812860  0.8446906423  1.0533724673
```

COORDINATES OF ALL ATOMS ARE (ANGS)

```
ATOM CHARGE  X      Y      Z
```

```
-----  
N      7.0  0.6671025528 -0.7688441758  0.0000000000  
N      7.0 -0.3922276449 -0.0477787112 -0.7350939583  
N      7.0 -0.3922276449 -0.0477787112  0.7350939583  
C      6.0  1.8789733582 -0.1360562953  0.0000000000  
N      7.0  2.9584168067  0.3110766091  0.0000000000  
H      1.0  0.0149812860  0.8446906423 -1.0533724673  
H      1.0  0.0149812860  0.8446906423  1.0533724673
```

TOTAL ENERGY = -258.0492733102  
ZPE: 0.043990

**F-triaziridine cs-TransitionState B3LYP/DZV(2d,p)**

```
-----  
N      7.0  1.1042492883  0.4372209409  0.0000000000  
N      7.0  0.0062450203 -0.1390734379  0.7383357779  
F      9.0  2.1311965344 -0.5257976596  0.0000000000  
H      1.0 -0.4989679317  0.6833617972  1.0939474976
```

COORDINATES OF ALL ATOMS ARE (ANGS)

```
ATOM CHARGE  X      Y      Z
```

```
-----  
N      7.0  1.1042492883  0.4372209409  0.0000000000  
N      7.0  0.0062450203 -0.1390734379 -0.7383357779  
N      7.0  0.0062450203 -0.1390734379  0.7383357779  
F      9.0  2.1311965344 -0.5257976596  0.0000000000  
H      1.0 -0.4989679317  0.6833617972 -1.0939474976  
H      1.0 -0.4989679317  0.6833617972  1.0939474976
```

TOTAL ENERGY = -265.0573310683

ZPE: 0.037474

**O'-triaziridine cs-TransitionState B3LYP/DZV(2d,p)**

```

-----
N      7.0  1.3243970937  0.3750969367  0.0000000000
N      7.0 -0.1351737444 -0.1814345188  0.7267169060
O      8.0  2.2381698933 -0.4580833407  0.0000000000
H      1.0 -0.5211097491  0.7229277208  1.0374949673
COORDINATES OF ALL ATOMS ARE (ANGS)
ATOM CHARGE   X       Y       Z
-----
N      7.0  1.3243970937  0.3750969367  0.0000000000
N      7.0 -0.1351737444 -0.1814345188 -0.7267169060
N      7.0 -0.1351737444 -0.1814345188  0.7267169060
O      8.0  2.2381698933 -0.4580833407  0.0000000000
H      1.0 -0.5211097491  0.7229277208 -1.0374949673
H      1.0 -0.5211097491  0.7229277208  1.0374949673
    
```

TOTAL ENERGY = -240.4550183140  
 ZPE: 0.032526

| Basis Set         | $\Delta E$<br>(kcal/mol) | cis N-N<br>(Å) | $\Delta SCF$<br>(eV) | Breathing Mode<br>(cm <sup>-1</sup> ) |
|-------------------|--------------------------|----------------|----------------------|---------------------------------------|
| DZV(d)            | 12.221                   | 1.423          | 0.375                | 1405.53                               |
| DZV(2d)           | 10.717                   | 1.424          | 0.376                | 1363.58                               |
| DZV(2d,p)         | 10.412                   | 1.425          | 0.374                | 1362.71                               |
| DZV+ (2d,p)       | 10.688                   | 1.425          | 0.394                | 1359.97                               |
| DZV++(2d,p)       | 10.707                   | 1.425          | 0.394                | 1359.44                               |
| DZV(2df,p)        | 10.398                   | 1.420          | 0.373                | 1372.71                               |
| DZV(2df,2p)       | 10.305                   | 1.420          |                      |                                       |
| DZV(3d)           | 10.335                   | 1.422          | 0.362                | 1384.47                               |
| DZV(3d,p)         | 10.238                   | 1.421          | 0.373                | 1384.76                               |
|                   |                          |                |                      |                                       |
| TZV(d)            | 12.481                   | 1.420          | 0.374                | 1382.88                               |
| TZV(2d)           | 11.054                   | 1.424          | 0.363                | 1366.49                               |
| TZV(2d,p)         | 10.800                   | 1.425          | 0.374                | 1364.08                               |
| TZV(2df,p)        | 10.830                   | 1.419          |                      |                                       |
| TZV(3d,p)         | 10.287                   | 1.421          | 0.374                | 1365.55                               |
|                   |                          |                |                      |                                       |
| aug-cc-pVDZ       | 10.680                   | 1.423          |                      |                                       |
| aug-cc-pVTZ       | 10.369                   | 1.419          |                      |                                       |
| aug-cc-pVQZ       | 10.358                   | 1.418          |                      |                                       |
| aug-cc-pV5Z       | 10.358                   | 1.418          |                      |                                       |
|                   |                          |                |                      |                                       |
| RHF/DZV(2d,p)     | 10.412                   | 1.425          | 0.374                | 1362.71                               |
| B3LYP/DZV(2d,p)   |                          | 1.472          |                      |                                       |
| M06/DZV(2d,p)     | 9.79                     | 1.454          |                      |                                       |
| MP2/DZV(2d,p)     | 10.0                     | 1.489          |                      |                                       |
|                   |                          |                |                      |                                       |
| Expt <sup>1</sup> |                          | 1.49           | 0.3528 ±<br>0.0004   |                                       |

Supplementary Material (ESI) for *PCCP*  
This journal is © the Owner Societies 2009

<sup>1</sup> Kim, Y., Seff K., *J Am Chem Soc* (1977) vol. 99 (21) pp. 7057-7059

Principal geometry results for triaziridine system using different wavefunction types, with distances in Angstrom and angles in degrees.

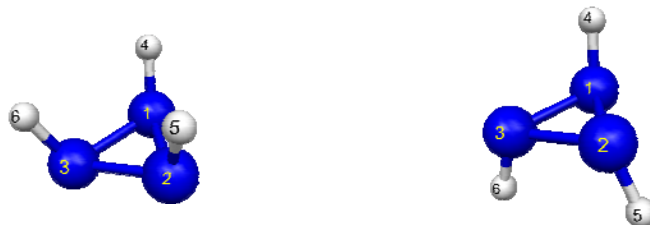

| (Z)-triaziridine                 |       |       |       | (E)-triaziridine |       |       |       |
|----------------------------------|-------|-------|-------|------------------|-------|-------|-------|
|                                  |       |       |       | HF               | MP2   | DFT   |       |
|                                  |       |       |       | r (N-N)          | 1.419 | 1.486 | 1.468 |
|                                  |       |       |       | r (N-N')         | 1.424 | 1.487 | 1.470 |
|                                  |       |       |       | r (N-H)          | 1.004 | 1.026 | 1.027 |
|                                  |       |       |       | r (N'-H)         | 1.002 | 1.025 | 1.025 |
| r (N-N)                          | 1.425 | 1.489 | 1.472 | α (N-N-N')       | 60.2  | 60.0  | 60.1  |
| r (N-H)                          | 1.005 | 1.028 | 1.029 | α (N1-N2-N3)     | 59.9  | 60.0  | 60.0  |
| α (N-N-H)                        | 109.4 | 106.6 | 107.9 | α (N1-N2-H5)     | 105.5 | 106.8 | 108.1 |
| δ (Nplane-H)                     | 101.7 | 99.9  | 100.7 | α (N2-N1-H4)     | 105.9 | 101.9 | 103.5 |
| Experimentaental N-N dist. [XXX] |       |       | 1.49  | δ (Nplane-H5)    | 104.2 | 102.7 | 103.4 |
|                                  |       |       |       | δ (Nplane-H4)    | 99.5  | 97.0  | 98.0  |

[XXX]: Kim, Y., Seff K., *J Am Chem Soc* (1977) vol. 99 (21) pp. 7057-7059

Calculated ionization energies for (E)-triaziridine and the lowest N<sub>3</sub>H<sub>3</sub> potential energy surface minimum (E)-triazene.

| Molecule                 | Calculated Ionization Potential (DZV(2d,p)) |        |        |
|--------------------------|---------------------------------------------|--------|--------|
|                          | HF                                          | MP2    | B3LYP  |
| (E)-triazene             | 0.3476                                      | 0.8895 | 0.3579 |
| (E)-triaziridine         | 0.3744                                      | 0.9329 | 0.3947 |
| Experiment <sup>S2</sup> | 0.4163±0.004 kcal/mol (9.6±0.1 eV)          |        |        |

<sup>S2</sup> Foner, S.N., Hudson, R. L., *J Chem Phys* (1958) vol. 29 (2) pp. 442-443 (experiment showed an isomer of N<sub>3</sub>H<sub>3</sub>, but not which isomer). Since triazene should be the most stable they assigned the value to it. The same value is also reported on the NIST chemistry book as the only experimental data on triazene.

PES relative energies using DZV(2d,p)

| Structure                          | HF    | MP2   | B3LYP | M06 |
|------------------------------------|-------|-------|-------|-----|
| (E)-triazene                       | 0.0   | 0.0   | 0.0   |     |
| (Z)-triazene                       | 6.3   | 5.2   | 4.7   |     |
| (Z,Z)-azimine                      | 29.1  | 13.0  | 16.2  |     |
| (E,Z)-azimine                      | 30.3  | 14.8  | 15.8  |     |
| (E,E)-azimine                      | 37.3  | 21.7  | 24.0  |     |
| (E)-triaziridine, C <sub>s</sub>   | 45.8  | 40.9  | 43.3  |     |
| (Z)-triaziridine, C <sub>3v</sub>  | 56.2  | 50.9  | 52.7  |     |
| Flat-triaziridine, D <sub>3h</sub> | 184.8 | 188.0 | 175.3 |     |



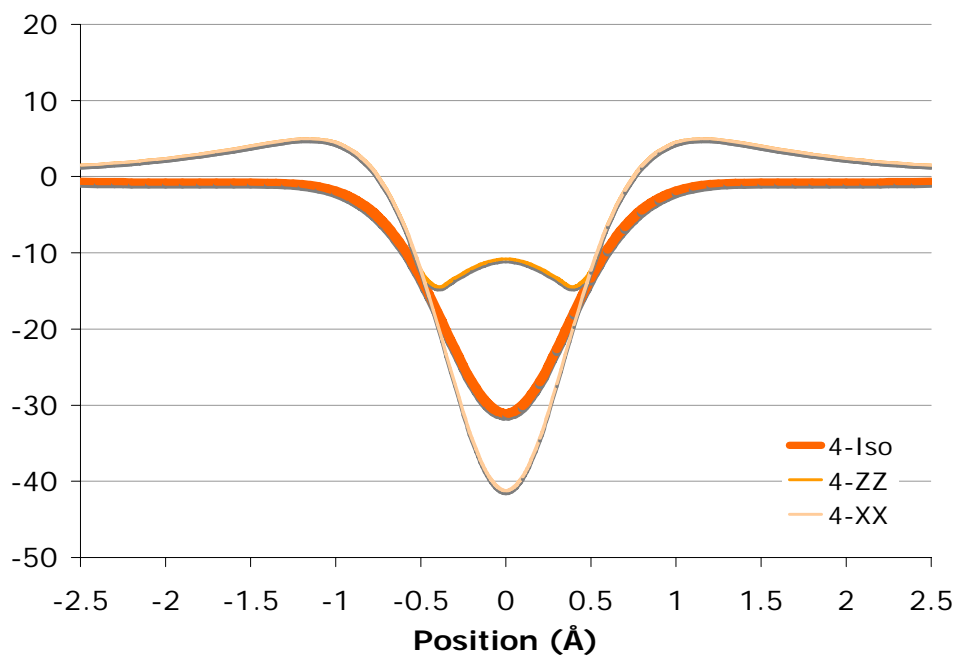

Supplement: b816782f.pdf [file b816782f.pdf]
